# Supplementary material
Source: Royal Society of Chemistry journal article supplement (doi:10.1039/d5nr05362e)
Supplement: d5nr05362e1.pdf [file d5nr05362e1.pdf]

## Interface-homogenized Engineering of Red Phosphorus/Activated Carbon for High-Performance Lithium-Ion Battery Anodes

Luzheng Zhao<sup>a</sup>, Zhensheng Guan<sup>a</sup>, Haoyuan Zhu<sup>a</sup>, Zaoyan Yu<sup>a</sup>, Yushuai Song<sup>a</sup>, Zhijia Xing<sup>a</sup>, Rui Sun<sup>a</sup>, Wenruo Li<sup>b</sup>, Liying Cui<sup>a</sup>, Zhongsheng Wen<sup>a,\*</sup>

<sup>a</sup> *Department of Materials, Dalian Maritime University, Dalian 116026, Liaoning, China*

<sup>b</sup> *School of Vehicle and Traffic, Shenyang Ligong University, Shenyang 110159, China*

\*Corresponding author.

*E-mail address: [zswen5@gmail.com](mailto:zswen5@gmail.com)*

To further evaluate the electronic conductivities, measurements were performed on commercial red phosphorus, P(H<sup>+</sup>) and P(H<sup>+</sup>)/C samples. Each solid powder was compressed into a pellet with a thickness of approximately 2 mm. The resulting pellet was then tightly sealed inside a 2025-type coin cell to ensure highly compact contact. Linear sweep voltammetry (LSV) was used to determine the resistance of each sample, with a voltage window of 0-1 V and a scan rate of 0.1 mV s<sup>-1</sup>.<sup>1</sup> The electronic conductivity ( $\sigma$ ) was subsequently calculated using Equation (1).

$$\sigma = L/(SR) \quad (1)$$

where  $\sigma$  is the conductivity, L and S is the thickness and the area of the sample disc respectively, and R is the resistance value.

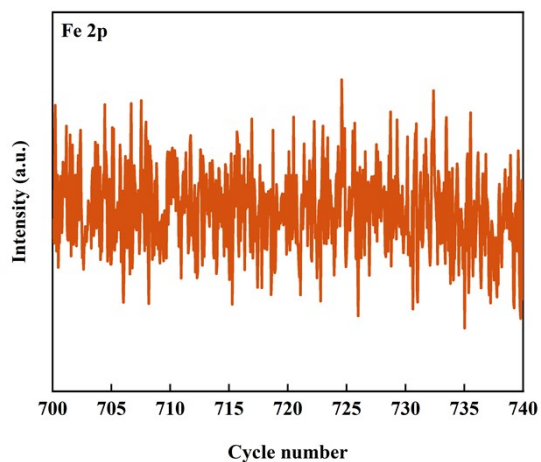

**Fig. S1** The Fe 2p spectrum of the P(H<sup>+</sup>) sample.

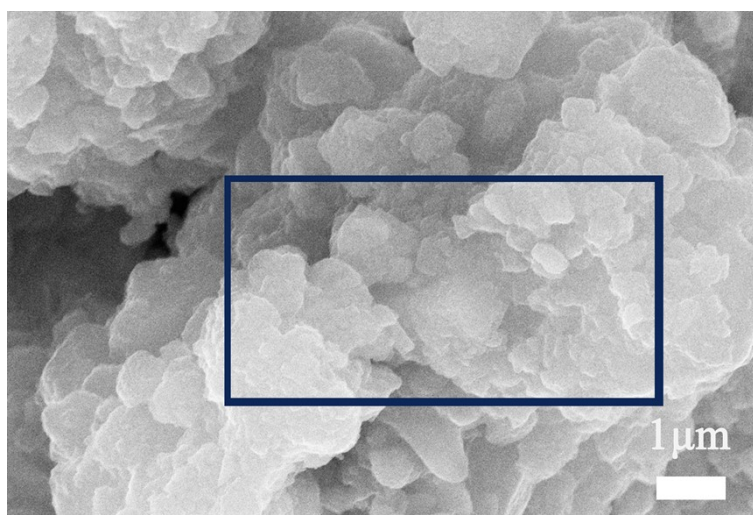

**Fig. S2** EDS analysis regions of P(H<sup>+</sup>) sample.

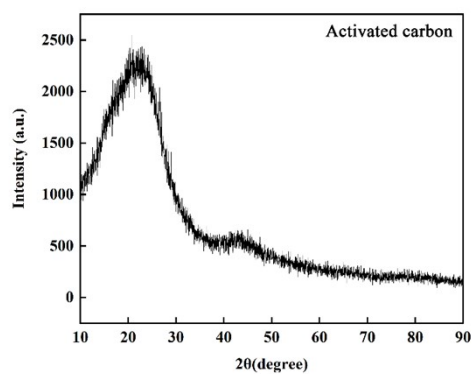

**Fig. S3** The XRD pattern of activated carbon.

**Tab. S1** Elemental composition of the P(H<sup>+</sup>) sample determined by EDS.

| Element | wt.%   | at.%   |
|---------|--------|--------|
| O       | 26.00  | 40.48  |
| P       | 74.00  | 59.52  |
| Fe      | 0.00   | 0.00   |
| Total   | 100.00 | 100.00 |

**Tab. S2** Comparison of the cycle performance of our work with other phosphorus-based anode materials for LIBs reported previously.

| Materials            | Current Density (mA g <sup>-1</sup> ) | Cycle | Capacity (mAh g <sup>-1</sup> ) | Reference |
|----------------------|---------------------------------------|-------|---------------------------------|-----------|
| P/Se@C               | 200                                   | 350   | 592.6                           | 2         |
| CNFs/RP              | 100                                   | 20    | ~600                            | 3         |
| RP@HC                | 120                                   | 100   | 577                             | 4         |
|                      | 100                                   | 100   | 292.22                          | 5         |
| P(H <sup>+</sup> )/C | 200                                   | 350   | 778                             | This work |

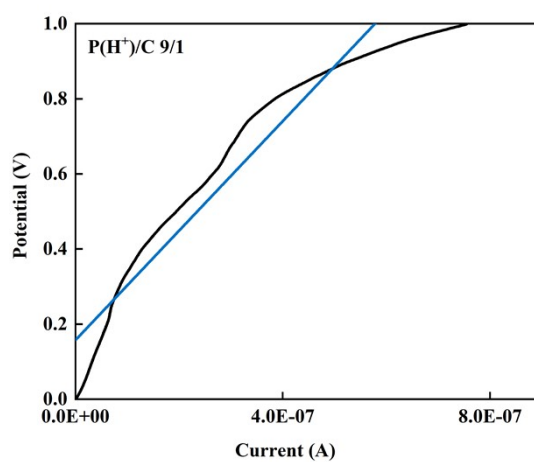

**Fig. S4** LSV of P(H<sup>+</sup>)/C 9/1 sample.

**Tab. S3** The electrical conductivities of the samples.

| Samples                         | L (cm) | S (cm <sup>2</sup> ) | R ( $\Omega$ ) | $\sigma$ (S cm <sup>-1</sup> ) |
|---------------------------------|--------|----------------------|----------------|--------------------------------|
| Commercial P <sup>1</sup>       | 0.20   | 1.767                | 10440500.00    | 1.08E <sup>-8</sup>            |
| P(H <sup>+</sup> ) <sup>1</sup> | 0.18   | 1.767                | 32634900.00    | 3.12E <sup>-9</sup>            |
| P(H <sup>+</sup> )/C 9/1        | 0.20   | 1.5386               | 1457851.14     | 8.92E <sup>-8</sup>            |

### Reference

1 L. Zhao, W. Li, W. Kong, J. Guo, H. Zhu, W. Yu, S. Liu, X. Han, L. Cui and Z. Wen, *Chem. Eng. J.*, 2024, **491**, 151976.
